# Supplementary material
Source: Springer Nature journal article supplement (https://www.springermedizin.de/resource/supplementary/12993_2011_341_MOESM2_ESM.pdf/9617566)

### Phase 3 (Testing)

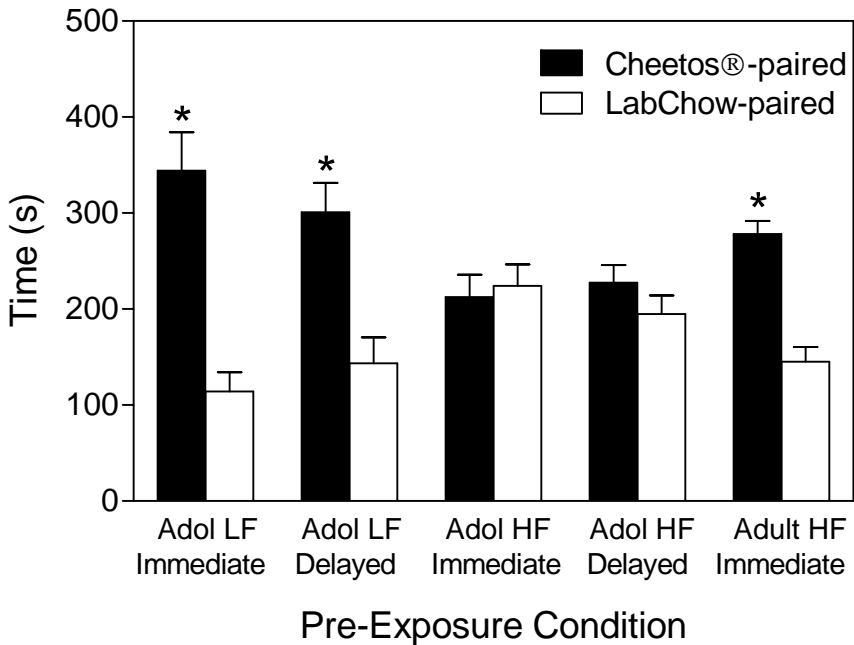

Supplement: MOESM2 [file 9617566]
